# Supplementary material for: MTMR14 Alleviates Chronic Obstructive Pulmonary Disease as a Regulator in Inflammation and Emphysema
Source: Oxid Med Cell Longev. 2022 Jan 7;2022:9300269. doi: 10.1155/2022/9300269 (PMC8759842; doi:10.1155/2022/9300269)
Supplement: Supplementary Materials — Supplemental Figure 1: the AAV infected the lung tissues of mice. The green fluorescent signal indicated AAV-positive cells in the three mouse groups: Negative control, NC-AAV, or MTMR14-AAV intratracheally administrated. [file 9300269.f1.zip]

Archive with 2 entries (2 files):
- Supplemental Files (1).docx
- Supplementary description.docx
